1 **Pursuit of chlorovirus genetic transformation and CRISPR/Cas9-mediated gene editing**

2 Eric A. Noel<sup>1,2</sup>, Donald P. Weeks<sup>3</sup>, James L. Van Etten<sup>1,4\*</sup>

3 <sup>1</sup> Nebraska Center for Virology, University of Nebraska, Lincoln, NE, United States of America

4 <sup>2</sup> School of Biological Sciences, University of Nebraska, Lincoln, NE, United States of America

5 <sup>3</sup> Department of Biochemistry, University of Nebraska, Lincoln, NE, United States of America

6 <sup>4</sup> Department of Plant Pathology, University of Nebraska, Lincoln, NE, United States of America

7

8 \*Corresponding author: [jvanetten1@unl.edu](mailto:jvanetten1@unl.edu)

## 9 Introduction

10 Research examining chloroviruses has provided many unexpected findings and concepts  
11 to the scientific community over the past 40 years [1]. However, despite these major achievements,  
12 no transformation system has been developed that allows the genetic modification of the large  
13 dsDNA viruses that infect certain unicellular *Chlorella*-like green microalgae. This transformation  
14 bottleneck creates a significant handicap in exploration of chlorovirus genomes that range from  
15 290 to 370 kb and that encode many unidentified proteins. The ability to genetically engineer  
16 chloroviruses, in order to study and eventually manipulate their biochemical pathways, would  
17 greatly enhance the utility of microalgae-chlorovirus counterparts as scientifically and industrially  
18 important organisms. Considering that no reliable current reverse genetics system exists for either  
19 *Chlorella variabilis* NC64A (hereafter NC64A) or chloroviruses, we are equally limited in the  
20 capacity to either characterize gene function or exploit unique virus-encoded proteins. With the  
21 advent of CRISPR technology and the ongoing discovery of new giant viruses and their annotated  
22 genomes, we are armed with resources that have yet to be married.

23 A significant barrier to genetic transformation of chloroviruses is the inaccessibility of its  
24 host, NC64A, to DNA or protein uptake. Genetic engineering of microalgal strains is difficult due  
25 to the great diversity of species with a variety of cell sizes, cell wall structures and composition  
26 and, likely, unique responses to foreign DNA [2]. Like plant cells, *Chlorella* cells are surrounded  
27 by a rigid outer cell wall composed of polysaccharides with a variety of sugars as well as lesser  
28 amounts of protein and lipid that presumably makes them more difficult to transform [3]. DNA  
29 delivery can be challenging since DNA has to be transferred through the cell wall, plasma  
30 membrane and nuclear membrane. Moreover, the cells must be able to survive the chemical or

31 mechanical treatments involved. Therefore, individualized protocols are needed for specific strains  
32 and, thus, a broad range of genetic transformation methods must be designed and tested.

33 Because microalgal cells are not able to take up exogenous DNA by nature, several genetic  
34 techniques have been developed for this purpose. Among transformation methods for the delivery  
35 of exogenous DNA, the most common techniques are electroporation, ballistic systems, agitation  
36 with glass beads and *Agrobacterium tumefaciens*-mediated transformation [4-7]. Although, most  
37 of these techniques have been proven to work with great success in such model algal strains as  
38 *Chlamydomonas reinhardtii*, *Phaeodactylum tricornutum*, *Scenedesmus*, *Ankistrodesmus* and  
39 some *Chlorella* sp. [8, 9], there is a lack of efficient and stable transformation techniques that can  
40 be applied to a broader range of microalgae strains.

41 In earlier reports of successful genetic transformation of specific *Chlorella* species, various  
42 methods were developed including the use of glass beads [10], *Agrobacterium tumefaciens*-  
43 mediated transformation [11-13], PEG [14], protoplasting [15, 16], and electroporation [17-19].  
44 Electroporation has become the favored tool for DNA delivery and genetic transformation of  
45 several microalgal species including *Chlamydomonas reinhardtii* [4], *Scenedesmus obliquus* [20],  
46 and *Nannochloropsis* sp. [21]. However the protocol optimization is often challenging, time-  
47 consuming and, most importantly, only proven in selected *Chlorella* sp. (*C. ellipsoidea*, *C.*  
48 *vulgaris*, *C. minutissima*, *C. zofingiensis* and *C. pyrenoidosa*) [22]. Microalgal species display a  
49 wide spectrum of resistance to transformation often based on differences in their ability to take up  
50 and incorporate exogenous molecules into their genomes. Moreover, cell viability can decrease  
51 rapidly when high voltages are needed and, likewise, increases in DNA fragment lengths can also  
52 affect transformation efficiencies [23].

53 Less traditional methods of microalga-transformation are being explored with some  
54 success. Karas *et al.* (2015) [24] and Diner *et al.* (2016) [25] showed that episomal plasmids  
55 containing a yeast-derived centromeric sequence CEN6-ARSH4-HIS3 can be transferred by  
56 conjugation from *E. coli* strains to the diatoms *Thalassiosira pseudonana* and *Phaeodactylum*  
57 *tricornutum*. Recently, Munoz *et al.* (2019) [26] also reported an efficient and stable  
58 transformation of the green microalgae *Acutodesmus obliquus* and *Neochloris oleoabundans* by  
59 transferring exogenous DNA from *E. coli* via conjugation.

60 CRISPR/Cas systems have been widely used to manipulate the genomes of both freshwater  
61 and marine microalgae [27]. In particular, there are a number of reports in which Cas9/sgRNA-  
62 ribonucleoproteins-based approaches have been used for algal genome engineering. For example,  
63 the Cas9 protein and sgRNA are preassembled *in vitro*, and directly delivered to algal cells either  
64 via electroporation or by a biolistic method [28, 29]. In *C. reinhardtii*, Cas9/sgRNA RNP  
65 complexes were directly delivered to the cells by electroporation and created targeted mutations  
66 in multiple loci [28, 30]. RNP-based approaches have also been used to generate more robust  
67 strains of the industrial alga *Coccomyxa* as a biofuel cell factory [31].

68 In attempts to modify chlorovirus DNA, we tested previously described transformation  
69 protocols for other *Chlorella* sp. to deliver preassembled Cas9 protein/sgRNA RNPs inside  
70 NC64A cells prior to infection. As a gene to target for Cas9/gRNA RNP modification, we chose a  
71 virus-encoded putative glycosyltransferase gene because we believed we could develop a  
72 screening scheme to select cells bearing mutations in the glycosylation pattern of the virus and  
73 because, if our hypothesis for functional identity of the gene was correct, we wished to use such  
74 mutants to investigate the details of chlorovirus glycosylation. Specifically, we chose to target  
75 NC64A CA-4B virus-encoded gene, *034r*, which is a homolog of the prototype NC64A virus

76 PBCV-1-encoded gene *a064r*, that encodes a highly characterized glycosyltransferase with three  
77 domains involved in protein glycosylation: domain 1 has a  $\beta$ -L-rhamnosyltransferase activity,  
78 domain 2 has an  $\alpha$ -L-rhamnosyltransferase activity, and domain 3 is a methyltransferase (MT) that  
79 decorates one position in the terminal  $\alpha$ -L-rhamnose unit [32]. The mutant selection scheme was  
80 based on the observation that CA-4B mutants can be selected by rabbit polyclonal antiserum  
81 derived from serologically distinct PBCV-1 mutants that have a mutation in gene *a064r* [33], that  
82 in turn produces truncated surface glycans. This antibody-based selection scheme, therefore,  
83 permits discrimination between wildtype viruses with native glycans decorating the major capsid  
84 protein (MCP) and viruses carrying an *a064r* gene mutation (caused by Cas9/gRNA-directed gene  
85 editing) that produce a specific surface glycan variant.

86 The overall strategy to modify chlorovirus DNA involved testing a variety of  
87 transformation methods that could support the delivery of preassembled Cas9 protein-sgRNA RNP  
88 complexes to generate a targeted gene cleavage event in the CA-4B gene *034r*. Transformation  
89 methods that were investigated included protocols with cell wall-targeting enzymes,  
90 electroporation, silicon carbide (SiC) whiskers, and cell-penetrating peptides (CPPs). The RNA-  
91 directed selection of a specific 20–22 bp nucleotide sequence within the target gene *034r* by the  
92 Cas9/sgRNA complex allows the two nuclease domains of Cas9 to create a double stranded break  
93 (DSB) at a predetermined site within the gene of interest. Repair of the DSB by the error-prone  
94 nonhomologous end joining (NHEJ) DNA repair system can result in gene inactivation (i.e., gene  
95 knockout). In an even more powerful approach, replacement of the cleaved DNA segment with a  
96 closely related DNA fragment via homologous-directed recombination (HDR) can result in gene  
97 replacement (i.e., gene knockin) or nucleotide(s) substitution. Previously, it was demonstrated that  
98 single-stranded oligodeoxynucleotides (ssODNs) could provide ~100-fold lower levels of

99 nonhomologous integrations compared with double-stranded counterparts [34] while providing  
100 scarless genomic editing and reduced unwanted off-target cutting [35]. Thus, in an effort to  
101 increase efficiency and accuracy of targeted DNA editing and replacement in chloroviruses, we  
102 also attempted to co-deliver a DNA template in the form of ssODN (Fig 1) with Cas9/RNPs that  
103 targets a 20 bp sequence within the first ~40 nucleotides of the *034r* domain 1 coding region. Our  
104 guide RNA was designed so that successful incorporation of a ssODN-mediated HDR event would  
105 remove a native MscI restriction site in *034r* while simultaneously introducing at a separate site a  
106 specific premature stop codon – a double event highly unlikely to occur by spontaneous gene  
107 mutation.

108

109 **Fig 1. sgRNA and ssODN designs for targeting CA-4B putative glycosyltransferase-gene**  
110 ***034r*.**

111 Top: Cartoon rendering of CA-4B putative glycosyltransferase-gene *034r* composed of three  
112 domains. Middle: DNA sequence of the initial coding region of the *034r* gene with the target site  
113 for Cas9/gRNA binding, cleavage and editing highlighted in gray. Red TGG, PAM site; green  
114 triangles, Cas9 cleavage sites; underlined, MscI restriction site. Bottom: Design of ssODN to  
115 replace the dinucleotide, CT, with AA (green) in the target gene. The homology arms specific to  
116 the gene target are flanking the nucleotides designed to be changed (green font). Shaded red, newly  
117 created stop codon.

118

## 119 **Methods**

120 **Alga growth conditions.** NC64A cells were grown in Bold's basal medium (BBM) (3 mM  
121 NaNO<sub>3</sub>, 170 μM CaCl<sub>2</sub> 2H<sub>2</sub>O, 304 μM MgSO<sub>4</sub> 7H<sub>2</sub>O, 431 μM K<sub>2</sub>HPO<sub>4</sub>, 1.3 mM KH<sub>2</sub>PO<sub>4</sub>, 428

122  $\mu\text{M}$  NaCl, 12  $\mu\text{M}$  Na<sub>2</sub>EDTA, 2.2  $\mu\text{M}$  FeCl<sub>3</sub> 6H<sub>2</sub>O, 1.2  $\mu\text{M}$  MnCl<sub>2</sub> 4H<sub>2</sub>O, 220 nM ZnSO<sub>4</sub> 7H<sub>2</sub>O,  
123 50 nM CoCl<sub>2</sub> 6H<sub>2</sub>O, 99 nM Na<sub>2</sub>MoO<sub>4</sub> 2H<sub>2</sub>O, 6.4  $\mu\text{M}$  CuSO<sub>4</sub> 5H<sub>2</sub>O, 184  $\mu\text{M}$  H<sub>3</sub>BO<sub>3</sub>) modified by  
124 the addition of 0.5% sucrose and 0.1% peptone (MBBM) [36]. All experiments were performed  
125 with cells grown to early log phase ( $4 - 7 \times 10^6$  cells/mL). Cell cultures were shaken (200 rpm) at  
126 26 °C under continuous light.

127 ***In vitro* Cas9/gRNA-directed DNA cleavage assay.** Production of chloroviruses PBCV-1, CA-  
128 4B and DNA isolation were performed as described [37]. An 835 bp CA-4B DNA target for  
129 Cas9/gRNA cleavage was PCR-amplified and purified using 2% agarose gel electrophoresis (DNA  
130 sequences for primers used for DNA amplification are provided in the legend to Fig S1). Purified  
131 *Streptococcus pyogenes* strain Cas9 (SpyCas9) and *Lachnospiraceae* bacterium Cpf1 (LbCpf1)  
132 (200 nM) were independently preincubated with sgRNA (600 nM) in cleavage buffer [ $1 \times$   
133 NEBuffer 3 (New England Biolabs, Ipswich, MA), 10 mM DTT, 10 mM CaCl<sub>2</sub>] at 37 °C for 15  
134 min. Target DNA (20 nM) was added to a final volume of 20  $\mu\text{L}$ . Reactions were incubated at 37  
135 °C for 1 h. DNA in cleavage reactions was purified by using a MinElute PCR Purification Kit  
136 (Qiagen), resolved by size on a 2% agarose gel and imaged on Gel Doc XR+ and ChemiDoc XRS+  
137 systems (Biorad).

138  
139 **Fig S1. *In vitro* cleavage assay.** The target *034r* locus from NC64A virus CA-4B was PCR-  
140 amplified and incubated with preassembled Cas9 and sgRNA RNP complexes *in vitro*. The  
141 complete *in vitro* cleavage of the target locus confirmed active RNP formation. PCR product (835  
142 nucleotides) was amplified using primers upstream and downstream of domain 1. Arrowheads  
143 indicate cleaved products. L, molecular size ladder. Forward PCR primer DNA sequence:

144 GCGGTGTTCTCTAAATTACC. Reverse PCR primer DNA sequence:  
145 CCAGTTGCTACCATCTCC.

146

147 **ssODN construct.** We used tandem co-delivery of a DNA template in the form of ssODN with  
148 Cas9/sgRNA RNPs in attempts to achieve HDR. The ssODN was 80 nt long, designed with  
149 homology arms extending 40 nt upstream and downstream of the sgRNA target in CA-4B *034r*,  
150 respectively (Fig 1). The ssODN contained two critical elements that permitted selection when  
151 incorporated into a mutant virus: (1) a point mutation (T to A) that converts a native MscI  
152 restriction site TGGCCA to AAGGCC, and (2) a separate site nucleotide substitution (C to A) that  
153 introduces a premature stop codon (TAA). A successful HDR event would remove the MscI  
154 restriction site and allow initial verification of HDR-mediated insertion by simply treating PCR  
155 amplicons with MscI and showing loss of the restriction site near the site of Cas9/RNP-mediated  
156 DNA cleavage. Amplicons were subsequently sequenced to determine if Cas9/gRNA- and  
157 ssODN-directed nucleotide replacement had occurred. The simultaneous presence of a premature  
158 stop codon would eliminate translation of the glycosyltransferase enzyme and result in a shortened  
159 glycan at the MCP surface of newly formed viruses. Such mutants could be discriminated from  
160 wild-type viruses in the antibody-based selection scheme described below.

161 **CA-4B mutant selection using mutant glycan-specific antibodies.** NC64A cells were infected  
162 with CA-4B (MOI 5) and incubated for 12 h (detailed below). Site-directed mutant viruses were  
163 selected with anti-Rabbit IgG magnetic beads (RayBiotech) according to the manufacturer's  
164 protocol (Fig 2A). In brief, rabbit polyclonal antiserum prepared against wild-type PBCV-1 (which  
165 also binds CA-4B) and collected during previous antibody studies [33], was added to a virally-  
166 induced cell lysate (see details below) and allowed to bind wild-type virus for 1 h. Goat anti-Rabbit



167 IgG magnetic beads were incubated with the rabbit antibody solution for 30 min and then separated  
168 using magnets. The unbound viruses were collected and subsequently incubated for 1 h with rabbit  
169 polyclonal antiserum derived from serologically distinct PBCV-1 mutants that have a mutation in  
170 gene *a064r* (homologous to CA-4B gene *034r*) that produces a specific truncated surface glycan.  
171 Goat anti-Rabbit IgG magnetic beads were incubated again with the rabbit antibody solution for  
172 30 min and then separated with magnets. After the unbound particulates were washed from the  
173 beads, the bound mutant antibodies were eluted from the beads using the elution buffer. The beads  
174 were then magnetically separated from the eluted solution. The eluted antibodies coupled to mutant  
175 viruses were removed manually and the viruses were then plaque assayed. Individual plaques were  
176 selected, and target DNA regions were PCR amplified with specific primers. The PCR products  
177 were size-verified using agarose gel electrophoresis, eluted from the gel and sequenced using the  
178 Sanger method (GENEWIZ).

179

180 **Fig 2. Recovery of CA-4B site-directed mutants by RNP-targeting.**

181 (A) Workflow of antibody selection for mutant chloroviruses. Following incubation of  
182 macerozyme-treated NC64A cells with Cas9/gRNA RNPs targeting the *034r* gene, cells were  
183 infected with CA-4A (MOI 5). Rabbit polyclonal antiserum (PBCV-1 antibody, green) was added  
184 to the viral-induced cell lysate to interact with wild-type viruses. Goat anti-Rabbit IgG magnetic  
185 beads were incubated with the rabbit antibody solution and then separated using magnets. The  
186 unbound viruses were collected and subsequently incubated with antibody derived from  
187 serologically distinct PBCV-1 mutants (antigenic mutant antibody, red) that have shortened  
188 surface glycans. Magnetic beads were incubated again with the antibody solution and then  
189 separated using magnets. Bound mutant viruses were eluted from the beads and plaque assayed.

190 (B) Following antibody selection for mutant CA-4B viruses, 13 plaques were recovered. Domain  
191 1 of *034r* from each virus isolate was sequenced. (C) Two indels (red) in *034r* from two CA-4B  
192 variants (1 and 2) were detected and sequence verified for site-directed mutagenesis by  
193 preassembled Cas9 protein-sgRNA RNPs in the PBCV-1 *a064r* homologous gene. PAM site, gray.  
194 Green triangle, Cas9/gRNA cleavage site. WT, wildtype sequence.

195  
196 **Cell wall-degrading enzymes.** Cellulase, chitinase, chitosanase (25.9 U/mL), drieselase,  $\beta$ -  
197 glucosidase,  $\beta$ -glucuronidase (140 U/mL), hyaluronidase, laminarinase, lysozyme, lyticase,  
198 macerozyme, pectinase (3,000 U/mL), pectolyase, sulphatase (3.37 mg/mL), and trypsin were  
199 purchased from Sigma Aldrich (St. Louis, MO). Zymolyase (10 mg/mL) was purchased from  
200 ZymoResearch (Irvine, CA). Macerozyme was purchased from RPI corp (Mt Prospect, IL). Stock  
201 concentrations of enzymes were 20 mg/mL unless otherwise noted.

202 **Assay of enzyme inhibited cell growth.** To assay growth inhibition due to enzymatic activity,  
203 200  $\mu$ L of algal cells normalized to an OD<sub>750</sub> of 1.0 was mixed with 4 mL of media containing 7.5  
204 g/L agar, which was at 42 °C and poured on a petri plate containing 15 g/L agar. Once hardened,  
205 10  $\mu$ L of enzyme stock was then spotted on the top agar and plates were incubated in the light at  
206 26 °C for 5 days. As a negative control for enzymatic activity, enzymes were heat denatured at  
207 100 °C for 10 min and spotted onto plates.

208 **NC64A transformation following enzymatic digestion of cell walls.** For cell wall digestion, one  
209 mL of cell culture of NC64A ( $5 \times 10^6$  cells) was centrifuged at 8,000 rpm for 5 min and the pellet  
210 was resuspended in the same volume of MBBM in the presence of cell wall-degrading enzymes  
211 (Table 1) or MBBM only. The culture was incubated for 24 h at 25 °C in continuous light. NC64A  
212 cells were centrifuged and resuspended in a solution (0.8 M NaCl and 0.05 M CaCl<sub>2</sub>). Prior to

213 NC64A cells being tested for their ability to be transformed with Cas9/sgRNA RNPs, all treated  
214 cells were previously infected with virus and analyzed by plaque assay to confirm treated cells  
215 retained their permissive qualities required for virus attachment and infection. To generate target-  
216 specific site-directed mutants using RNP complexes in NC64A, enzyme-treated and nontreated  
217 cells were transformed with either Cas9 or Cpf1 (200 µg) premixed with *034r*-targeting sgRNA  
218 (140 µg). Cas9 and Cpf1 proteins in storage buffer (20 mM HEPES pH 7.5, 150 mM KCl, 1 mM  
219 DTT, and 10% glycerol) were mixed independently with sgRNA dissolved in nuclease-free water  
220 and incubated for 10 min at room temperature. The mixture of cells and Cas9 (or Cpf1)/sgRNA  
221 RNPs was incubated for 15 min at room temperature. Cas9(Cpf1)/sgRNA-transformed, enzyme-  
222 treated NC64A cells were then infected with CA-4B and incubated overnight. Virus mutants were  
223 selected using the same antibody selection assay previously described. DNA from virus plaques  
224 were analyzed by PCR and sequenced to detect indel mutations caused by NHEJ. In experiments  
225 testing for ssODN-mediated HDR, *034r* gene PCR amplicons were first tested for sensitivity to  
226 cleavage by MscI prior to DNA sequencing.

227 **Table 1. Growth inhibition of *Chlorella variabilis* NC64A by a variety of enzymes.**

| Enzyme                 | NC64A |
|------------------------|-------|
| Cellulase              | –     |
| Chitinase              | +++   |
| Chitosanase            | +     |
| Driselase              | –     |
| $\beta$ -Glucosidase   | –     |
| $\beta$ -Glucuronidase | –     |
| Hyaluronidase          | –     |
| Laminarinase           | +++   |
| Lysozyme               | +++   |
| Lyticase               | +++   |
| Macerozyme             | +++   |
| Pectinase              | +++   |
| Pectolyase             | –     |
| Sulphatase             | +     |
| Trypsin                | –     |
| Zymolyase              | –     |

228 –, no growth inhibition; +++, complete growth inhibition

229

230 **Flow cytometry.** Cell permeability assays were performed on the BD FACSAria cell sorter using  
231 ATTO™ 550 labeled Alt-R™ Cas9 tracrRNA from IDT (Coralville, IA). The 67mer Alt-R™  
232 CRISPR-Cas9 tracrRNA has a ATTO™ 550 fluorescent dye attached to the 5' end. The  
233 fluorescent dye allows for an optical analysis of transfected cells and cell sorting by FACS. During  
234 data acquisition, algal cells were positively defined by their chlorophyll autofluorescence. A  
235 minimum chlorophyll autofluorescence was set to eliminate potential false positives from bacteria  
236 and debris present in the culture. One  $\mu$ L of ATTO™ 550-labeled tracrRNA (200  $\mu$ M) was added,  
237 incubated for 2 min, and loaded on the BD FACSAria where 20,000 cells were imaged. Samples  
238 were excited using a 488 nm laser and 660–740 nm (chlorophyll) and 480–560 nm (ATTO)  
239 emission data as well as bright field image data were collected. Populations were gated for in-  
240 focus cells and analyzed for permeability to labeled tracrRNA.

241 **NC64A transformation using SiC whiskers.** For each transformation, NC64A cells were  
242 concentrated and resuspended in 800  $\mu$ L fresh MBBM ( $5 \times 10^7$  cells) in a 1.5 mL microfuge tube  
243 and mixed with 50 mg sterile SiC whiskers and preassembled Cas9/sgRNA RNP (armed with the  
244 protospacer sequence targeting domain 1 of CA-4B *034r*) in the presence and absence of the  
245 ssODN shown in Fig 1. Samples were agitated by a vortex mixer at top speed for 2 min, stopping  
246 briefly every 10 s. Immediately after vortexing, samples were diluted with 200  $\mu$ L PEG (20% PEG  
247 8000) reaching a final volume of 1 mL, and infected with CA-4B virus as described above.  
248 Following overnight infection, virus mutants were selected using the same antibody selection assay  
249 previously described. DNA from virus plaques were analyzed by PCR and sequenced to detect  
250 indel mutations caused by NHEJ, while *034r* gene PCR amplicons were also incubated with MscI  
251 to screen for ssODN-mediated HDR.

252 **NC64A transformation using electroporation.** Purified Cas9 (100  $\mu$ g) was preincubated at a 1:3  
253 molar ratio with the *034r*-targeting sgRNA at 37 °C for 15 min to form RNP complexes. For  
254 transfection, 250  $\mu$ L cell culture ( $2.5 \times 10^8$  cells/mL) supplemented with sucrose (40 mM) were  
255 mixed with preincubated RNPs, and 150 nM ssODNs. Cells were electroporated in 2-mm cuvettes  
256 (600 V, 50  $\mu$ F, 200  $\Omega$ ) by using Gene Pulser Xcell (Biorad). Immediately after electroporation,  
257 800  $\mu$ L of MBBM with 40 mM sucrose was added to the sample and the cells were infected with  
258 CA-4B (MOI 5). Following overnight infection, virus mutants were selected using the same  
259 antibody selection assay previously described. Virus plaques were analyzed by PCR and  
260 sequenced to detect indel mutations by NHEJ, while *034r* gene PCR amplicons were also  
261 incubated with MscI to screen for ssODN-mediated HDR.

262 **Cell-penetrating peptides.** Peptides were provided by Dr. Heriberto Cerutti (UNL) and Keiji  
263 Numata (RIKEN): (BP100)<sub>2</sub>K<sub>8</sub> (KKLFFKKILKYLKKLFFKKILKYLKKKKKKKK, theoretical

264 pI/Mw: 10.75/3851.13 Da) and BP100(KH)<sub>9</sub> (KKLFKKILKYLKHKHKHKHKHKHKHKHKH,  
265 theoretical pI/Mw: 10.81/ 3809.71 Da) [38]. Peptide/RNP complexes were prepared by adding  
266 different amounts of each peptide to the Cas9/sgRNA RNP mixture at various ratios (0.1, 0.5, 1,  
267 2, 5, 10, and 20). The solution was thoroughly mixed by repeated pipetting and allowed to stabilize  
268 for 30 min at 25 °C.

269 **NC64A transformation using CPPs.** Referring to a previous study [30], 10 µg of Cas9 and 12 µg  
270 of sgRNA were incubated at room temperature for 15 min. A prepared cell sample of 100 µl at  
271  $3 \times 10^8$  cells/mL was added to the incubated RNP, ssODNs, and gently mixed. Tested  
272 independently, (BP100)<sub>2</sub>K<sub>8</sub> or BP100(KH)<sub>9</sub> [38] was added to the sample and mixed immediately.  
273 In a series of experiments, we observed that there was no significant difference between the two  
274 types of treatment with CPPs: (1) pre-incubation of RNP and CPP for the formation of complex,  
275 and (2) CPP and RNP added separately to the cells. After incubation of the cells mixed with the  
276 RNP and CPP for 30 min at 25 °C, trypsin was added, and the mixture was incubated for 15 min  
277 at 37 °C. The sample was washed by MBBM media and transferred to 10 mL of MBBM media  
278 and incubated for 16 h under dim light without shaking as a “recovery” step. Following incubation,  
279 cells were infected with CA-4B (MOI 5) and incubated overnight (24 h). Following overnight  
280 infection, virus mutants were selected using the same antibody selection assay previously  
281 described. DNA from virus plaques were analyzed by PCR and sequenced to detect indel mutations  
282 caused by NHEJ, while *034r* gene PCR amplicons were also incubated with MscI to screen for  
283 ssODN-mediated HDR.

284 ***Agrobacterium* strain and vectors.** The binary vector pCAMBIA1303 containing a *gfp:gusA*  
285 fusion reporter, gene *a064r* from a PBCV-1 antigenic mutant referred to as EPA-1, and a selectable  
286 marker for hygromycin B resistance driven by the CaMV 35S promoter were used for

287 transformation. The binary vector was mobilized into *A. tumefaciens* strain LBA4404 by using the  
288 Biorad Gene Pulser Xcell electroporator (Hercules, CA) according to manufacturer's protocol.  
289 Transformed cells were aliquoted and maintained at -80°C in 25% (v/v) glycerol.

290 **Antibiotic sensitivity test.** The sensitivity of *A. tumefaciens* towards the antibiotic cefotaxime was  
291 tested by inoculating 200 µL of *Agrobacterium* culture ( $OD_{600} = 1.0$ ) in 5 mL LB broth  
292 supplemented with varying concentrations of cefotaxime (0, 50, 100, 150, 200, 300, 400 and 500  
293 mg/L) and the growth of *Agrobacterium* in each concentration was measured  
294 spectrophotometrically at  $OD_{600}$  after 2 days. The effect of the antibiotic cefotaxime on the  
295 viability of NC64A was accessed by plating a serially-diluted microalgae culture on solid MBBM  
296 supplemented with different concentrations of cefotaxime (0, 100, 200, 300, 400 and 500 mg/L).  
297 The agar plates were incubated in the dark for 2 days at 25 °C before exposure to light and the  
298 number of surviving colonies from the dilution that produced less than 100 colonies was counted  
299 in duplicates after 2 weeks. To determine the minimum inhibitory concentration of hygromycin B,  
300  $1 \times 10^6$  NC64A cells were plated on solid MBBM medium supplemented with 500 mg/L  
301 cefotaxime and varying concentrations of hygromycin B (6, 8, 10, 12, 14, 16, 18, 20, 23 and 26  
302 mg/L). Each treatment was tested in triplicate. The agar plates were incubated for 2 days in the  
303 dark at 25 °C before exposure to light and the number of surviving colonies was accessed after 20  
304 days.

305 **NC64A transformation using *Agrobacterium*.** A general transformation procedure for NC64A  
306 was established based on work done by Kumar *et al.* (2004) [5] on transformation of *C. reinhardtii*  
307 with some adjustment as described here. Single colonies of *Agrobacterium* initiated from a frozen  
308 stock were used to inoculate 10 mL of LB supplemented with 5 mM glucose, 100 mg/L  
309 streptomycin and 50 mg/L kanamycin and grown overnight in a rotary shaker at 27 °C with shaking

310 at 200 rpm in the dark. Five mL of this overnight culture was used to inoculate 50 mL of the same  
311 medium and it was grown in the dark at 27 °C with shaking at 200 rpm until  $OD_{600} = 0.8-1.2$ . The  
312 bacterial culture was harvested by centrifugation and washed once with induction medium  
313 (MBBM plus 150  $\mu$ M acetosyringone, pH 5.6) and diluted to a final density of  $OD_{600} = 0.5$ . Prior  
314 to co-cultivation, a total of  $5 \times 10^6$  NC64A cells from a log-phase culture ( $OD_{600} = 0.5-1.0$ ) were  
315 pre-cultured for 5 days on MBBM agarose plates at 25 °C and harvested with induction medium  
316 on the day of co-cultivation. The algal cell pellet was mixed with 200  $\mu$ L of the bacterial  
317 suspension and plated on induction medium solidified with 1.2% (w/v) bacto-agar. Co-cultivation  
318 was performed for 3 days at 25 °C in the dark. Following co-cultivation, cells were harvested with  
319 MBBM supplemented with 500 mg/L cefotaxime in a total volume of 7 mL and incubated in the  
320 dark at 25 °C for 2 days to eliminate *Agrobacterium*. Visualization of *gfp* expression was  
321 performed using a confocal fluorescent microscope (Nikon A1R-Ti2 confocal system, UNL  
322 Microscopy Core facility). Subsequently, the remaining cells were plated on selective media  
323 containing 20 mg/L hygromycin B and 500 mg/L cefotaxime and incubated at 25 °C in the dark  
324 for 2 days before exposure to light. Resistant colonies were propagated on non-selective media  
325 and utilized for PCR analysis. Assays for detection of contaminating *Agrobacterium* were  
326 performed by growing cells on LB agar plates for at least 7 days at 25 °C in the dark.

327

## 328 **Results**

329 **Chitinase, laminarinase, lysozyme, lyticase, macerozyme, and pectinase enzymes inhibit**  
330 **growth of NC64A.** Inhibition of cell growth by an active preparation of cell wall-degrading  
331 enzyme suggests the enzyme is either degrading the cell wall during its construction or that the  
332 enzyme interferes with precursor generation prior to precursor assembly into the cell wall. From a



333 variety of enzymes tested (Table 1), chitinase, laminarinase, lysozyme, lyticase, macerozyme, and  
334 pectinase had the greatest negative effect on NC64A growth as judged by the size of the zone of  
335 inhibition around the spotted area. By comparison, chitosanase and sulphatase caused minor  
336 growth inhibition. Heat denatured enzymes did not impact growth in the assay, indicating the  
337 growth inhibition was due to the enzymatic activity alone and not from other potentially toxic  
338 components in the enzyme preparations.

339 **Preassembled RNPs with fluorescently labeled tracrRNA enters enzyme-treated NC64A**  
340 **cells.** Fluorescently labeled Alt-R™ Cas9 tracrRNA was used to evaluate cell permeability and  
341 visualized using flow cytometer (BD FACSAria). The resulting data were analyzed by setting a  
342 minimum ATTO™ 550 fluorescent intensity threshold, such that the majority of untreated cells  
343 (Fig 3A) had fluorescence intensity lower than the threshold. Cells with a fluorescent intensity  
344 above this threshold were considered permeable to the tracrRNA dye as indicated by cells  
345 pretreated with macerozyme (Fig 3B), or vortexed with SiC whiskers or electroporated prior to  
346 fluorescence-activated cell sorting (FACS) (Fig 3C and 3D, respectively). Cells contained 5.6%,  
347 12.4%, and 18.6% of total sample fluorescence when treated with either macerozyme, vortexed with  
348 SiC whiskers, or electroporated, respectively. In contrast, cells not treated with enzymes contained  
349 less than 0.1% of total sample fluorescence.

350

351 **Fig 3. FACS dot plot analysis of fluorescently labeled NC64A cells.**

352 NC64A cells were visualized by intracellular incorporation of fluorescently labeled tracrRNA  
353 (ATTO™ 550), (A) without enzyme treatment, or prior to FACS were (B) macerozyme digested,  
354 (C) vortexed with SiC whiskers, or (D) electroporated. Cells were illuminated with a white LED  
355 for bright field and a 488 nm laser for fluorescence. Images were collected in the bright field and

356 480–560 nm emission (ATTO™ 550 fluorescence) channels. Cell populations with a high  
357 fluorescent intensity were gated for in-focus cells and analyzed for permeability.

358

359 **Design, production, and testing of a sgRNA targeting a specific site in the CA-4B virus *034r***

360 **gene.** A sgRNA was designed to cleave the CA-4B virus in the first domain of the  
361 glycosyltransferase gene *034r* at 27 nucleotides into the coding region (Fig 1). To ensure this  
362 molecule was active and accurate in cleaving target DNA when combined *in vitro* with  
363 *Streptococcus pyogenes* strain Cas9 (SpyCas9), the appropriate sgRNA fragment (denoted in Fig  
364 1) was synthesized and tested for its ability to cut a PCR-amplified 835 bp fragment of the CA-4B  
365 virus first domain. The data of Fig S1 confirmed the ability of the *in vitro*-assembled Cas9/sgRNA  
366 RNP complex to accurately cleave the CA-4B viral DNA fragment into the expected 600 bp and  
367 235 bp fragments.

368 **Antibody-based selection and recovery of Cas9/gRNA RNP-induced chlorovirus mutants**

369 **from macerozyme-treated NC64A cells.** We have shown previously that CA-4B is recognized  
370 by antibodies to PBCV-1 and by antibodies to certain PBCV-1 antigenic variants (mutants) making  
371 such antibodies useful to isolate wild-type and mutant versions of CA-4B virus [39]. In addition,  
372 studies involving spontaneous mutant viruses have demonstrated previously that disruption of  
373 PBCV-1 *a064r* leads to viruses with an altered glycan attached to the MCP and that these mutants  
374 are antigenically different from wild type PBCV-1 [40]. In additional studies [33, 41], polyclonal  
375 antisera were prepared against these spontaneous mutants. This allowed us to screen for viruses  
376 containing a disrupted *034r* gene using antibody that specifically recognized viruses with a gene-  
377 inactivating mutation in the homologous *a064r* gene.

378 Macerozyme-treated NC64A cells were mixed with Cas9/sgRNA RNP complexes  
379 targeting *034r* and subsequently infected with CA-4B overnight. Following incubation of viruses  
380 recovered from ruptured cells with the serologically distinct antigenic antibody, the putative  
381 mutant precipitate was eluted, and plaque assayed (Fig 2A). The presence of mutations in the  
382 resulting plaques were subsequently verified by DNA sequencing of domain 1 from *034r* using  
383 appropriate PCR primers. Two independent plaques showed separate modifications adjacent to the  
384 Cas9/sgRNA cleavage site (a nucleotide substitution in DNA from one plaque and a nucleotide  
385 substitution in DNA from the other – Fig 2C). This result is fully consistent with that expected  
386 from site-directed mutagenesis targeted in the PBCV-1 *a064r* homologous gene, CA-4B *034r*, by  
387 our specifically designed Cas9/sgRNA RNP complex (Fig 1 and Fig 2). These observations  
388 suggest successful delivery into macerozyme-treated NC64A cells of preassembled Cas9/sgRNA  
389 RNPs that resulted in a frameshift mutation in the CA-4B-encoded gene *034r* of one viral progeny  
390 and a phenylalanine to leucine codon change in a separate viral progeny. Many attempts to obtain  
391 additional examples of gene editing with this particular Cas9/sgRNA RNP failed.

392 **No evidence for HDR events using ssODNs.** All attempts at producing nucleotide sequence  
393 replacement by homologous DNA recombination (HDR) using ssODNs to simultaneously create  
394 a premature stop codon and remove the native MscI restriction site in the *034r* gene were also  
395 unsuccessful. Amplicons of *034r* DNA fragments from recovered CA-4B viral plaques after  
396 antibody selection were incubated with MscI. Virus DNA was digested into two DNA fragments  
397 that were consistent in size with a MscI-digested amplicon thus suggesting an intact MscI site in  
398 each of the samples tested (restriction digestions not shown). The conservation of the restriction  
399 site provides no evidence for ssODN-mediated HDR using the present methods.

400 **Antibiotic sensitivity and resistance of *Agrobacterium* and NC64A cultures.** Prior to testing if  
401 NC64A cells could be genetically transformed using *A. tumefaciens*, we determined the levels of  
402 hygromycin needed to kill nontransformed NC64A cells and the levels of cefotaxime needed to  
403 rid cultures of *A. tumefaciens* following co-incubation of the algal and bacterial cells. Growth of  
404 *A. tumefaciens* was suppressed at a cefotaxime concentration as low as 50 mg/L (Fig 4A) whereas  
405 the growth of NC64A was found to be uninhibited in cefotaxime-supplemented media up to 1000  
406 mg/L (Fig 4B). Thus, 500 mg/L of cefotaxime was selected for all experiments to ensure thorough  
407 elimination of *Agrobacterium* post-transformation. The lowest concentration of hygromycin B  
408 which completely inhibited the growth of NC64A was 20 mg/L (Fig 4C), and this concentration  
409 was used for subsequent selection of transformants. To verify successful electroporation of the  
410 pCAMBIA1303 binary vector carrying a kanamycin resistance gene (see below) into the *A.*  
411 *tumefaciens* strain to be used for transforming NC64A cells, colony PCR was performed. The data  
412 in Fig 5 verified that successful plasmid mobilization into *A. tumefaciens* cells had occurred.

413

414 **Fig 4. The effects of antibiotics on *Agrobacterium* and NC64A.**

415 (A) The effect of cefotaxime on *Agrobacterium* viability. The effect of (B) cefotaxime and (C)  
416 hygromycin on NC64A viability.

417

418 **PCR-confirmed *Agrobacterium*-mediated transformation of NC64A cells.** To determine if *A.*  
419 *tumefaciens* could be used to transfer T-DNA containing foreign genes into the genome of NC64A  
420 cells, we mixed the algal cells with *A. tumefaciens* strain LBA4404 harboring the binary vector  
421 pCAMBIA1304 containing the *gfp:gusA* fusion reporter, a hygromycin phosphotransferase (*hpt*)  
422 selectable marker driven by the CaMV35S promoter, and the mutant *a064r glycosyltransferase*

423 *gene* from a PBCV-1 antigenic mutant referred to as EPA-1 (EPA1-*a064r*). The mutant *gene*  
424 contains a missense mutation (C→T) at nucleotide position 236 resulting in an amino acid  
425 substitution (S79L) that causes production of a truncated glycan at the surface of the MCP [41].  
426 NC64A transformation was assessed by monitoring transient  $\beta$ -glucuronidase (GUS) and *gfp*  
427 expression 2 days after algal and bacterial co-incubation.

428 From among a few hundred colonies containing putative transformants that appeared  
429 within 20 days on selection media (containing 20 mg/L hygromycin and 500 mg/L cefotaxime)  
430 (Fig 5C) a total of eight hygromycin-resistant single colonies were randomly selected and grown  
431 in liquid media (containing 500 mg/L cefotaxime but lacking hygromycin) before the DNA was  
432 extracted and used in PCR analysis. Amplification with EPA1-*a064r* domain 1 (D1) gene-specific  
433 primers successfully detected the 633 bp *a064r* gene fragment from seven putative transgenic lines  
434 (Fig 5A), which represents 87.5% of the total number of screened colonies. To rule out  
435 *Agrobacterium* contamination, amplification with Kan<sup>R</sup> gene-specific primers only produced the  
436 expected 795 bp Kan<sup>R</sup> gene fragments in LBA4404 (positive control) but not in the seven putative  
437 NC64A transgenic lines (Fig 5B). The presence and absence of these gene-specific fragments in  
438 seven putative transgenic lines with no amplification product detected in non-infected wild-type  
439 NC64A cells indicated the successful transfer of both the hygromycin marker and the GFP-GUS  
440 reporter gene as a single T-DNA unit flanked by the left and right borders. The identity of the PCR  
441 amplicons derived from transgenic NC64A colonies (Fig 5C) were further confirmed to be positive  
442 by DNA sequencing where sequence alignment showed 99 and 98% identity to the *hpt* and *gfp-*  
443 *gusA* genes in pCAMBIA1303 respectively (Gene Bank accession no. AF234300).

444

445 **Fig 5. PCR analysis of putative NC64A transformants transformed with recombinant**  
446 **pCAMBIA1303 *034r* domain 1.**

447 (A) Amplification of the 633 bp fragment of the *a064r* domain 1 gene fragment from four  
448 LBA4404 colonies post-electroporation, and eight NC64A colonies after *Agrobacterium*-mediated  
449 transformation. (B) Amplification of the *Kan<sup>R</sup>* gene from LBA4404 (positive control) but not in  
450 the seven putative NC64A transgenic lines. (C) Transgenic NC64A colonies on selective media  
451 (containing 20 mg/L hygromycin and 500 mg/L cefotaxime).

452  
453 **Confocal fluorescent microscopy of NC64A cells expressing the *gfp* gene.** Visualization of GFP  
454 using a fluorescent microscope confirmed weak expression of the *gfp* gene in cells early after  
455 transformation (Fig 6). However, the failure of DNA isolated from many hygromycin-resistant  
456 colonies to produce DNA amplification products from either of two PCR primer pairs indicates  
457 the potential for ‘escapes’ through antibiotic selection. The seven transgenic NC64A lines that  
458 were previously confirmed positive for EPA1-*a064r* D1 by PCR could not be maintained or  
459 subcultured on hygromycin-supplemented media. No GUS-positive cells were detected in  
460 transgenic lines post-selection with hygromycin, although PCR amplification confirmed the  
461 presence of the *gfp-gusA* gene (data not shown). This indicates the possibility of silencing of the  
462 *gfp-gusA* gene and other transgenes in transgenic lines.

463  
464 **Fig 6. Green fluorescence of NC64A cells transformed by *A. tumefaciens* containing the**  
465 **pCAMBIA1304 binary vector carrying the *gfp-gusA* reporter gene.**

466 Confocal fluorescent microscopy of live NC64A cells transformed with *A. tumefaciens* containing  
467 pCAMBIA1304 as imaged through green, red, and GFP channels (from left to right). The GFP

468 channel displays fluorescence due to expression of the green fluorescent protein. Bar represents  
469 approximately 5  $\mu\text{m}$ .

470

## 471 **Discussion**

472 Reverse genetic manipulation of NC64A genomes is currently not possible and as a result  
473 directed modification of chloroviruses has yet to be achieved. We attempted to produce  
474 recombinant chloroviruses for many years by placing plasmids containing a virus gene (including  
475 the glycosyltransferase described in this manuscript) into host alga cells and then infecting with a  
476 chlorovirus and screening for recombinant nascent viruses as is done for making recombinant  
477 vaccinia viruses [42]. Genetic recombination is known to occur in the chloroviruses [43, 44].  
478 Although many vectors were constructed and various ways to introduce the plasmids into the host  
479 alga were tried, recombinant viruses were never obtained. The lack of success in some of the  
480 earliest experiments was initially thought to be due to the fact that the chloroviruses produce and  
481 package virus-encoded DNA restriction endonucleases in their virions. These restriction enzymes  
482 are involved in digesting the host DNA shortly after virus infection. However, despite the fact that  
483 many of the more recent attempts were conducted with virus CA-4B, which does not appear to  
484 code for a restriction endonuclease, success was not obtained.

485 Consequently, with the advent of the CRISPR/Cas9 system there was hope that such  
486 problems might be overcome. In the research reported here, we attempted to develop a  
487 transformation system to generate stable site-directed chlorovirus mutants by targeting a  
488 chlorovirus glycosyltransferase-gene that conveniently provided a distinguishable and selectable  
489 glycan phenotype. Despite our efforts to improve methods to penetrate host NC64A cells and

490 modify CA-4A viral DNA, we were unable to produce a reliable transformation system that  
491 supported the genetic modification of chloroviruses.

492         The most promising results in the present study was the recovery of two CA-4B mutants  
493 that harbored hallmark, sequence-verified, Cas9/sgRNA RNP-directed indels. However, despite  
494 exhaustive numbers of trails and alternative enzyme combinations, we were unable to duplicate  
495 these results. It is unlikely that detection of the mutant virus DNA was due to erroneous sequencing  
496 given that all samples were sequenced in triplicate with consistent readings. One possible  
497 explanation for obtaining the RNP-mediated NHEJ event in CA-4A viral DNA is that macerozyme  
498 on a rare occasion successfully eroded the alga cell wall, promoting cell permeability, allowing  
499 the entrance of the RNP-targeting cargo. Despite targeting cell-wall polymers, macerozyme did  
500 not compromise all the host receptors sufficiently to prevent virus attachment as evidenced by  
501 routinely productive virus infections in macerozyme-treated cells. The host receptor, which is  
502 likely a carbohydrate, is uniformly present over the entire surface of the alga [45]. Once inside the  
503 infected cell, deposited viral DNA could be recognized by the gene-targeting RNPs. The lack of  
504 success of the SiC and electroporation procedures in producing mutant viruses is somewhat  
505 surprising given evidence of RNP delivery inside NC64A was greater using these delivery  
506 techniques compared to macerozyme-treated cells (Fig 3). Perhaps the fluorescently labeled cells,  
507 although in greater quantity, were either nonviable or compromised in health that prevented the  
508 desired viral DNA editing.

509         In one study [46], 14 different strains of *Chlorella* were challenged with cell wall-  
510 degrading enzymes and no two strains had the same pattern of inhibition. This large range of  
511 sensitivity to various enzymatic activities illustrates the wide diversity of cell wall composition  
512 amongst the *Chlorella* alga species. Our results show that in methodologies or processes using



513 intact algal cells or residual algal biomass, enzymatic treatment can have large impacts on the  
514 permeability of the algal cell walls and may be useful in optimization of various processes.

515 FACS analysis of SiC whiskers-treated and electroporated NC64A cells showed ~12% and  
516 ~20% cell fluorescence, respectively, suggesting positive delivery of the RNPs inside the alga  
517 cells. We speculate that cell wall perforations either induced by mechanical force or voltage  
518 allowed Cas9/sgRNA RNP complexes brief access to the inside of the cell. In theory, once viral  
519 DNA is deposited inside the alga cell, the naked nucleic acid is available for Cas9/sgRNA binding  
520 and subsequent *034r* gene cleavage. The edited viral DNA would be subsequently replicated and  
521 packaged. Following antibody selection, we expected to recover an NHEJ indel event in CA-4B  
522 at the RNP-designated target site, however, with just two exceptions, we were unsuccessful.  
523 Although putatively mutant virus plaques were recovered by our screening techniques, sequencing  
524 results confirmed that in the vast majority of recovered viruses the wildtype *034r* gene was intact.  
525 Given these sequencing results, the plaques produced were likely caused by escape viruses that  
526 evaded wildtype antibody binding.

527 We also briefly examined the effect of parameters involving cell-penetrating peptides, such  
528 as the peptide/RNP ratio and serum addition, on peptide-mediated transfection. Properties of  
529 peptides (DNA binding stability and condensation capacity) and of peptide/RNP complexes (size  
530 and surface charge) were investigated because these are known to vary as a function of the  
531 peptide/RNP ratio. Following antibody selection, we expected to recover an NHEJ indel event in  
532 CA-4B at the Cas9/sgRNA RNP-designated target site. However, we were unsuccessful. Although  
533 virus plaques were recovered, sequencing results confirmed the wildtype *034r* gene was intact.  
534 Given these sequencing results, these plaques, again, were likely caused by escape viruses that  
535 evaded wildtype antibody binding.

536 Finally, our results from *Agrobacterium*-mediated transformation of NC64A demonstrated  
537 its potential for being a reasonably promising transformational system to further pursue and  
538 optimize. Here, seven PCR-positive transformants were obtained, and the presence of the viral  
539 gene fragment suggests that the T-DNA was integrated into the NC64A genome; however, more  
540 extensive studies are needed to elucidate possible factors and mechanisms contributing to the loss  
541 of the *gfp-gusA* expression and hygromycin resistance. Approaches to prevent or minimize gene  
542 silencing might prove useful in maintaining the expression of newly introduced genes. Other  
543 vector systems and/or promoters might also need to be tested with NC64A to develop a better  
544 transformation system. Nonetheless, the finding opens the possibility of further genetic  
545 manipulation of this commercially important microalga with other genes of interest.

546 Broadly speaking, genetic modification of chloroviruses would provide functional insight  
547 into the unusual chlorovirus encoded proteins mentioned previously such as hyaluronan synthase,  
548 potassium ion channel protein, five polyamine biosynthetic enzymes, and as addressed here,  
549 glycosyltransferases. Furthermore, adoption of a reverse genetics system would also allow the  
550 exploration of formerly characterized proteins having potential scientific and economic benefit.  
551 For example, chlorovirus genes encode commercially important enzymes such as DNA restriction  
552 endonucleases and contain elements for genetically engineering other organisms. Examples  
553 include viral promoter elements that function well in both monocot and dicot higher plants, as well  
554 as bacteria [47, 48], and a translational enhancer element that functions in *Arabidopsis* [49].  
555 Chloroviruses have some of the smallest, most primitive forms of highly complex proteins that  
556 exist in higher organisms serving as a simplified fossil template to study biochemical models for  
557 mechanistic and structural studies [50]. Therefore, the development of a successful and  
558 reproducible procedure for achieving genetic modification of chloroviruses would accelerate the

559 exploration of microalgae and their viruses for a broader range of scientific investigations and  
560 biotechnological applications. Such an achievement would be a major step forward.

561

## 562 **Acknowledgements**

563 The authors want to acknowledge the contributions of their many colleagues who have been  
564 involved in enumerable previous (unsuccessful) attempts to develop methods to produce  
565 recombinant chloroviruses. We thank Dr. Keiji Numata (RIKEN) for his provision of the cell  
566 penetrating peptides used in our studies. This work was funded in part by NSF Grant 1736030  
567 (JVE) and the NSF Graduate Research Fellowship Program Grant 250506019500 (EN).

568 **References**

- 569 1. Van Etten, J.L., I.V. Agarkova, and D.D. Dunigan, Chloroviruses. *Viruses*, 2020. 12(1): p.  
570 20
- 571 2. Gimpel, J.A., V. Henríquez, and S.P. Mayfield, In metabolic engineering of eukaryotic  
572 microalgae: potential and challenges come with great diversity. *Frontiers in microbiology*,  
573 2015. 6: p. 1376
- 574 3. Northcote, D., K. Goulding, and R. Horne, The chemical composition and structure of the  
575 cell wall of *Chlorella pyrenoidosa*. *Biochem. J.*, 1958. 70(3): p. 391
- 576 4. Jeon, K., A. Suresh, and Y.-C. Kim, Highly efficient molecular delivery into  
577 *Chlamydomonas reinhardtii* by electroporation. *Korean Journal of Chemical Engineering*,  
578 2013. 30(8): p. 1626-1630
- 579 5. Kumar, S.V., R.W. Misquitta, V.S. Reddy, B.J. Rao, and M.V. Rajam, Genetic  
580 transformation of the green alga—*Chlamydomonas reinhardtii* by *Agrobacterium*  
581 *tumefaciens*. *Plant Sci.*, 2004. 166(3): p. 731-738
- 582 6. Tan, C., S. Qin, Q. Zhang, P. Jiang, and F. Zhao, Establishment of a micro-particle  
583 bombardment transformation system for *Dunaliella salina*. *The Journal of Microbiology*,  
584 2005. 43(4): p. 361-365
- 585 7. Kindle, K.L., High-frequency nuclear transformation of *Chlamydomonas reinhardtii*. *Proc.*  
586 *Natl. Acad. Sci. USA*, 1990. 87(3): p. 1228-1232
- 587 8. Sanitha, M., S. Radha, A.A. Fatima, S.G. Devi, and M. Ramya, *Agrobacterium*-mediated  
588 transformation of three freshwater microalgal strains. *Pol J Microbiol*, 2014. 63(4): p. 387-  
589 382

- 590 9. Suttangkakul, A., A. Sirikhachornkit, P. Juntawong, W. Puangtame, T. Chomtong, S. Srifa,  
591 S. Sathitnaitam, W. Dumrongthawatchai, K. Jariyachawalid, and S. Vuttipongchaikij,  
592 Evaluation of strategies for improving the transgene expression in an oleaginous microalga  
593 *Scenedesmus acutus*. *BMC Biotechnol.*, 2019. 19(1): p. 4
- 594 10. Kim, D.-H., Y.T. Kim, J.J. Cho, J.-H. Bae, S.-B. Hur, I. Hwang, and T.-J. Choi, Stable  
595 integration and functional expression of flounder growth hormone gene in transformed  
596 microalga, *Chlorella ellipsoidea*. *Mar. Biotechnol.*, 2002. 4(1): p. 63-73
- 597 11. San Cha, T., W. Yee, and A. Aziz, Assessment of factors affecting *Agrobacterium*-  
598 mediated genetic transformation of the unicellular green alga, *Chlorella vulgaris*. *World*  
599 *Journal of Microbiology and Biotechnology*, 2012. 28(4): p. 1771-1779
- 600 12. Lin, H.-D., B.-H. Liu, T.-T. Kuo, H.-C. Tsai, T.-Y. Feng, C.-C. Huang, and L.-F. Chien,  
601 Knockdown of *PsbO* leads to induction of *HydA* and production of photobiological H<sub>2</sub> in  
602 the green alga *Chlorella* sp. DT. *Bioresour. Technol.*, 2013. 143: p. 154-162
- 603 13. Lou, S., L. Wang, L. He, Z. Wang, G. Wang, and X. Lin, Production of crocetin in  
604 transgenic *Chlorella vulgaris* expressing genes *crtRB* and *ZCD1*. *J. Appl. Phycol.*, 2016.  
605 28(3): p. 1657-1665
- 606 14. Yang, B., J. Liu, Y. Jiang, and F. Chen, *Chlorella* species as hosts for genetic engineering  
607 and expression of heterologous proteins: progress, challenge and perspective.  
608 *Biotechnology journal*, 2016. 11(10): p. 1244-1261
- 609 15. Kumar, M., J. Jeon, J. Choi, and S.-R. Kim, Rapid and efficient genetic transformation of  
610 the green microalga *Chlorella vulgaris*. *J. Appl. Phycol.*, 2018. 30(3): p. 1735-1745

- 611 16. Liu, L., Y. Wang, Y. Zhang, X. Chen, P. Zhang, and S. Ma, Development of a new method  
612 for genetic transformation of the green alga *Chlorella ellipsoidea*. *Mol. Biotechnol.*, 2013.  
613 54(2): p. 211-219
- 614 17. Niu, Y.F., M.H. Zhang, W.H. Xie, J. Li, Y. Gao, W.D. Yang, J.S. Liu, and H.Y. Li, A new  
615 inducible expression system in a transformed green alga, *Chlorella vulgaris*. *Genet Mol*  
616 *Res*, 2011. 10(4): p. 3427-34
- 617 18. Chien, L.-F., T.-T. Kuo, B.-H. Liu, H.-D. Lin, T.-Y. Feng, and C.-C. Huang, Solar-to-  
618 bioH<sub>2</sub> production enhanced by homologous overexpression of hydrogenase in green alga  
619 *Chlorella* sp. DT. *International journal of hydrogen energy*, 2012. 37(23): p. 17738-17748
- 620 19. Bai, L.-L., W.-B. Yin, Y.-H. Chen, L.-L. Niu, Y.-R. Sun, S.-M. Zhao, F.-Q. Yang, R.R.-C.  
621 Wang, Q. Wu, and X.-Q. Zhang, A new strategy to produce a defensin: stable production  
622 of mutated NP-1 in nitrate reductase-deficient *Chlorella ellipsoidea*. *PloS one*, 2013. 8(1)
- 623 20. Guo, S.-L., X.-Q. Zhao, Y. Tang, C. Wan, M.A. Alam, S.-H. Ho, F.-W. Bai, and J.-S.  
624 Chang, Establishment of an efficient genetic transformation system in *Scenedesmus*  
625 *obliquus*. *J. Biotechnol.*, 2013. 163(1): p. 61-68
- 626 21. Kilian, O., C.S. Benemann, K.K. Niyogi, and B. Vick, High-efficiency homologous  
627 recombination in the oil-producing alga *Nannochloropsis* sp. *Proc. Natl. Acad. Sci. USA*,  
628 2011. 108(52): p. 21265-21269
- 629 22. Guihéneuf, F., A. Khan, and L.-S.P. Tran, Genetic engineering: a promising tool to  
630 engender physiological, biochemical, and molecular stress resilience in green microalgae.  
631 *Frontiers in plant science*, 2016. 7: p. 400
- 632 23. Muñoz, C.F., L. de Jaeger, M.H. Sturme, K.Y. Lip, J.W. Olijslager, J. Springer, E.J.  
633 Wolbert, D.E. Martens, G. Eggink, and R.A. Weusthuis, Improved DNA/protein delivery

- 634 in microalgae—A simple and reliable method for the prediction of optimal electroporation  
635 settings. *Algal research*, 2018. 33: p. 448-455
- 636 24. Karas, B.J., R.E. Diner, S.C. Lefebvre, J. McQuaid, A.P. Phillips, C.M. Noddings, J.K.  
637 Brunson, R.E. Valas, T.J. Deerinck, and J. Jablanovic, Designer diatom episomes delivered  
638 by bacterial conjugation. *Nature communications*, 2015. 6(1): p. 1-10
- 639 25. Diner, R.E., V.A. Bielinski, C.L. Dupont, A.E. Allen, and P.D. Weyman, Refinement of  
640 the diatom episome maintenance sequence and improvement of conjugation-based DNA  
641 delivery methods. *Frontiers in bioengineering and biotechnology*, 2016. 4: p. 65
- 642 26. Muñoz, C.F., M.H. Sturme, S. D'Adamo, R.A. Weusthuis, and R.H. Wijffels, Stable  
643 transformation of the green algae *Acutodesmus obliquus* and *Neochloris oleoabundans*  
644 based on *E. coli* conjugation. *Algal research*, 2019. 39: p. 101453
- 645 27. Patel, V.K., N. Soni, V. Prasad, A. Sapre, S. Dasgupta, and B. Bhadra, CRISPR–Cas9  
646 System for Genome Engineering of Photosynthetic Microalgae. *Mol. Biotechnol.*, 2019: p.  
647 1-21
- 648 28. Baek, K., D.H. Kim, J. Jeong, S.J. Sim, A. Melis, J.-S. Kim, E. Jin, and S. Bae, DNA-free  
649 two-gene knockout in *Chlamydomonas reinhardtii* via CRISPR-Cas9 ribonucleoproteins.  
650 *Scientific Reports*, 2016. 6: p. 30620
- 651 29. Greiner, A., S. Kelterborn, H. Evers, G. Kreimer, I. Sizova, and P. Hegemann, Targeting  
652 of photoreceptor genes in *Chlamydomonas reinhardtii* via zinc-finger nucleases and  
653 CRISPR/Cas9. *The Plant Cell*, 2017. 29(10): p. 2498-2518
- 654 30. Shin, S.-E., J.-M. Lim, H.G. Koh, E.K. Kim, N.K. Kang, S. Jeon, S. Kwon, W.-S. Shin, B.  
655 Lee, and K. Hwangbo, CRISPR/Cas9-induced knockout and knock-in mutations in  
656 *Chlamydomonas reinhardtii*. *Scientific reports*, 2016. 6(1): p. 1-15

- 657 31. Yoshimitsu, Y., J. Abe, and S. Harayama, Cas9-guide RNA ribonucleoprotein-induced  
658 genome editing in the industrial green alga *Coccomyxa* sp. strain KJ. *Biotechnology for*  
659 *biofuels*, 2018. 11(1): p. 1-10
- 660 32. Speciale, I., M.E. Laugieri, E. Noel, S. Lin, T.L. Lowary, A. Molinaro, G.A. Duncan, I.V.  
661 Agarkova, D. Garozzo, and M.G. Tonetti, Chlorovirus PBCV-1 protein A064R has three  
662 of the transferase activities necessary to synthesize its capsid protein N-linked glycans.  
663 *Proceedings of the National Academy of Sciences*, 2020. 117(46): p. 28735-28742
- 664 33. Wang, I.N., Y. Li, Q. Que, M. Bhattacharya, L.C. Lane, W.G. Chaney, and J.L. Van Etten,  
665 Evidence for virus-encoded glycosylation specificity. *Proc Natl Acad Sci U S A*, 1993.  
666 90(9): p. 3840-4
- 667 34. Zorin, B., P. Hegemann, and I. Sizova, Nuclear-gene targeting by using single-stranded  
668 DNA avoids illegitimate DNA integration in *Chlamydomonas reinhardtii*. *Eukaryotic cell*,  
669 2005. 4(7): p. 1264-1272
- 670 35. Ferenczi, A., D.E. Pyott, A. Xipnitou, and A. Molnar, Efficient targeted DNA editing and  
671 replacement in *Chlamydomonas reinhardtii* using Cpf1 ribonucleoproteins and single-  
672 stranded DNA. *Proceedings of the National Academy of Sciences*, 2017. 114(51): p.  
673 13567-13572
- 674 36. Van Etten, J.L., D.E. Burbank, Y. Xia, and R.H. Meints, Growth cycle of a virus, PBCV-  
675 1, that infects *Chlorella*-like algae. *Virology*, 1983. 126(1): p. 117-25
- 676 37. Van Etten, J.L., R.H. Meints, D.E. Burbank, D. Kuczmariski, D.A. Cuppels, and L.C. Lane,  
677 Isolation and characterization of a virus from the intracellular green alga symbiotic with  
678 *Hydra viridis*. *Virology*, 1981. 113(2): p. 704-11



- 679 38. Ng, K.K., Y. Motoda, S. Watanabe, A. Sofiman Othman, T. Kigawa, Y. Kodama, and K.  
680 Numata, Intracellular delivery of proteins via fusion peptides in intact plants. PLoS One,  
681 2016. 11(4): p. e0154081
- 682 39. Van Etten, J.L., L.C. Lane, and R.H. Meints, Viruses and viruslike particles of eukaryotic  
683 algae. *Microbiol Rev*, 1991. 55(4): p. 586-620
- 684 40. De Castro, C., I. Speciale, G. Duncan, D.D. Dunigan, I. Agarkova, R. Lanzetta, L. Sturiale,  
685 A. Palmigiano, D. Garozzo, A. Molinaro, M. Tonetti, and J.L. Van Etten, N-Linked  
686 Glycans of Chloroviruses Sharing a Core Architecture without Precedent. *Angew Chem*  
687 *Int Ed Engl*, 2016. 55(2): p. 654-8
- 688 41. Speciale, I., G.A. Duncan, L. Unione, I.V. Agarkova, D. Garozzo, J. Jimenez-Barbero, S.  
689 Lin, T.L. Lowary, A. Molinaro, E. Noel, M.E. Laugier, M.G. Tonetti, J.L. Van Etten, and  
690 C. De Castro, The N-glycan structures of the antigenic variants of chlorovirus PBCV-1  
691 major capsid protein help to identify the virus-encoded glycosyltransferases. *J. Biol.*  
692 *Chem.*, 2019. 294(14): p. 5688-5699
- 693 42. Mackett, M., G.L. Smith, and B. Moss, General method for production and selection of  
694 infectious vaccinia virus recombinants expressing foreign genes. *Journal of virology*, 1984.  
695 49(3): p. 857-864
- 696 43. Tessman, I., Genetic recombination of the DNA plant virus PBCV-1 in a *Chlorella*-like  
697 alga. *Virology*, 1985. 145(2): p. 319-322
- 698 44. Graves, M.V., C.T. Bernadt, R. Cerny, and J.L. Van Etten, Molecular and genetic evidence  
699 for a virus-encoded glycosyltransferase involved in protein glycosylation. *Virology*, 2001.  
700 285(2): p. 332-345

- 701 45. Meints, R.H., D.E. Burbank, J.L. Van Etten, and D.T. Lamport, Properties of the Chlorella  
702 receptor for the virus PBCV-1. *Virology*, 1988. 164(1): p. 15-21
- 703 46. Gerken, H.G., B. Donohoe, and E.P. Knoshaug, Enzymatic cell wall degradation of  
704 Chlorellavulgaris and other microalgae for biofuels production. *Planta*, 2013. 237(1): p.  
705 239-253
- 706 47. Mitra, A. and D.W. Higgins, The Chlorella virus adenine methyltransferase gene promoter  
707 is a strong promoter in plants. *Plant molecular biology*, 1994. 26(1): p. 85-93
- 708 48. Mitra, A., D.W. Higgins, and N.J. Rohe, A chlorella virus gene promoter functions as a  
709 strong promoter both in plants and bacteria. *Biochemical and biophysical research*  
710 *communications*, 1994. 204(1): p. 187-194
- 711 49. Nguyen, P.S., D.L. Falcone, and M.V. Graves, The A312L 5'-UTR of Chlorella virus  
712 PBCV-1 is a translational enhancer in Arabidopsis thaliana. *Virus Res.*, 2009. 140(1-2): p.  
713 138-46
- 714 50. Plugge, B., S. Gazzarrini, M. Nelson, R. Cerana, J.L. Van Etten, C. Derst, D. DiFrancesco,  
715 A. Moroni, and G. Thiel, A potassium channel protein encoded by chlorella virus PBCV-  
716 1. *Science*, 2000. 287(5458): p. 1641-4
- 717

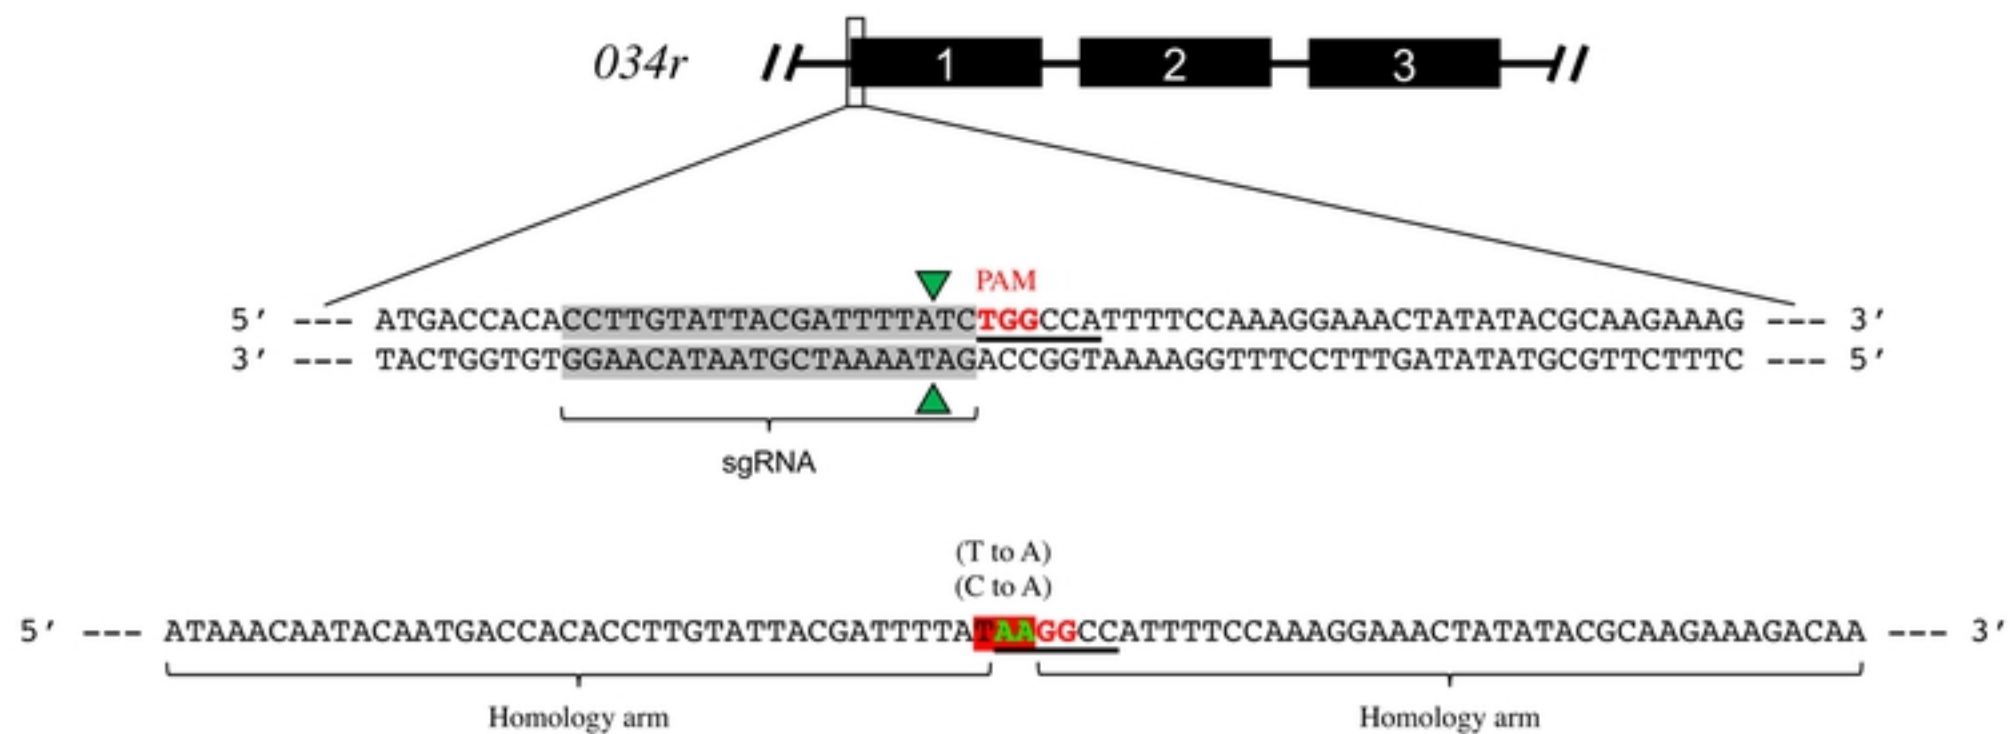

Fig 1

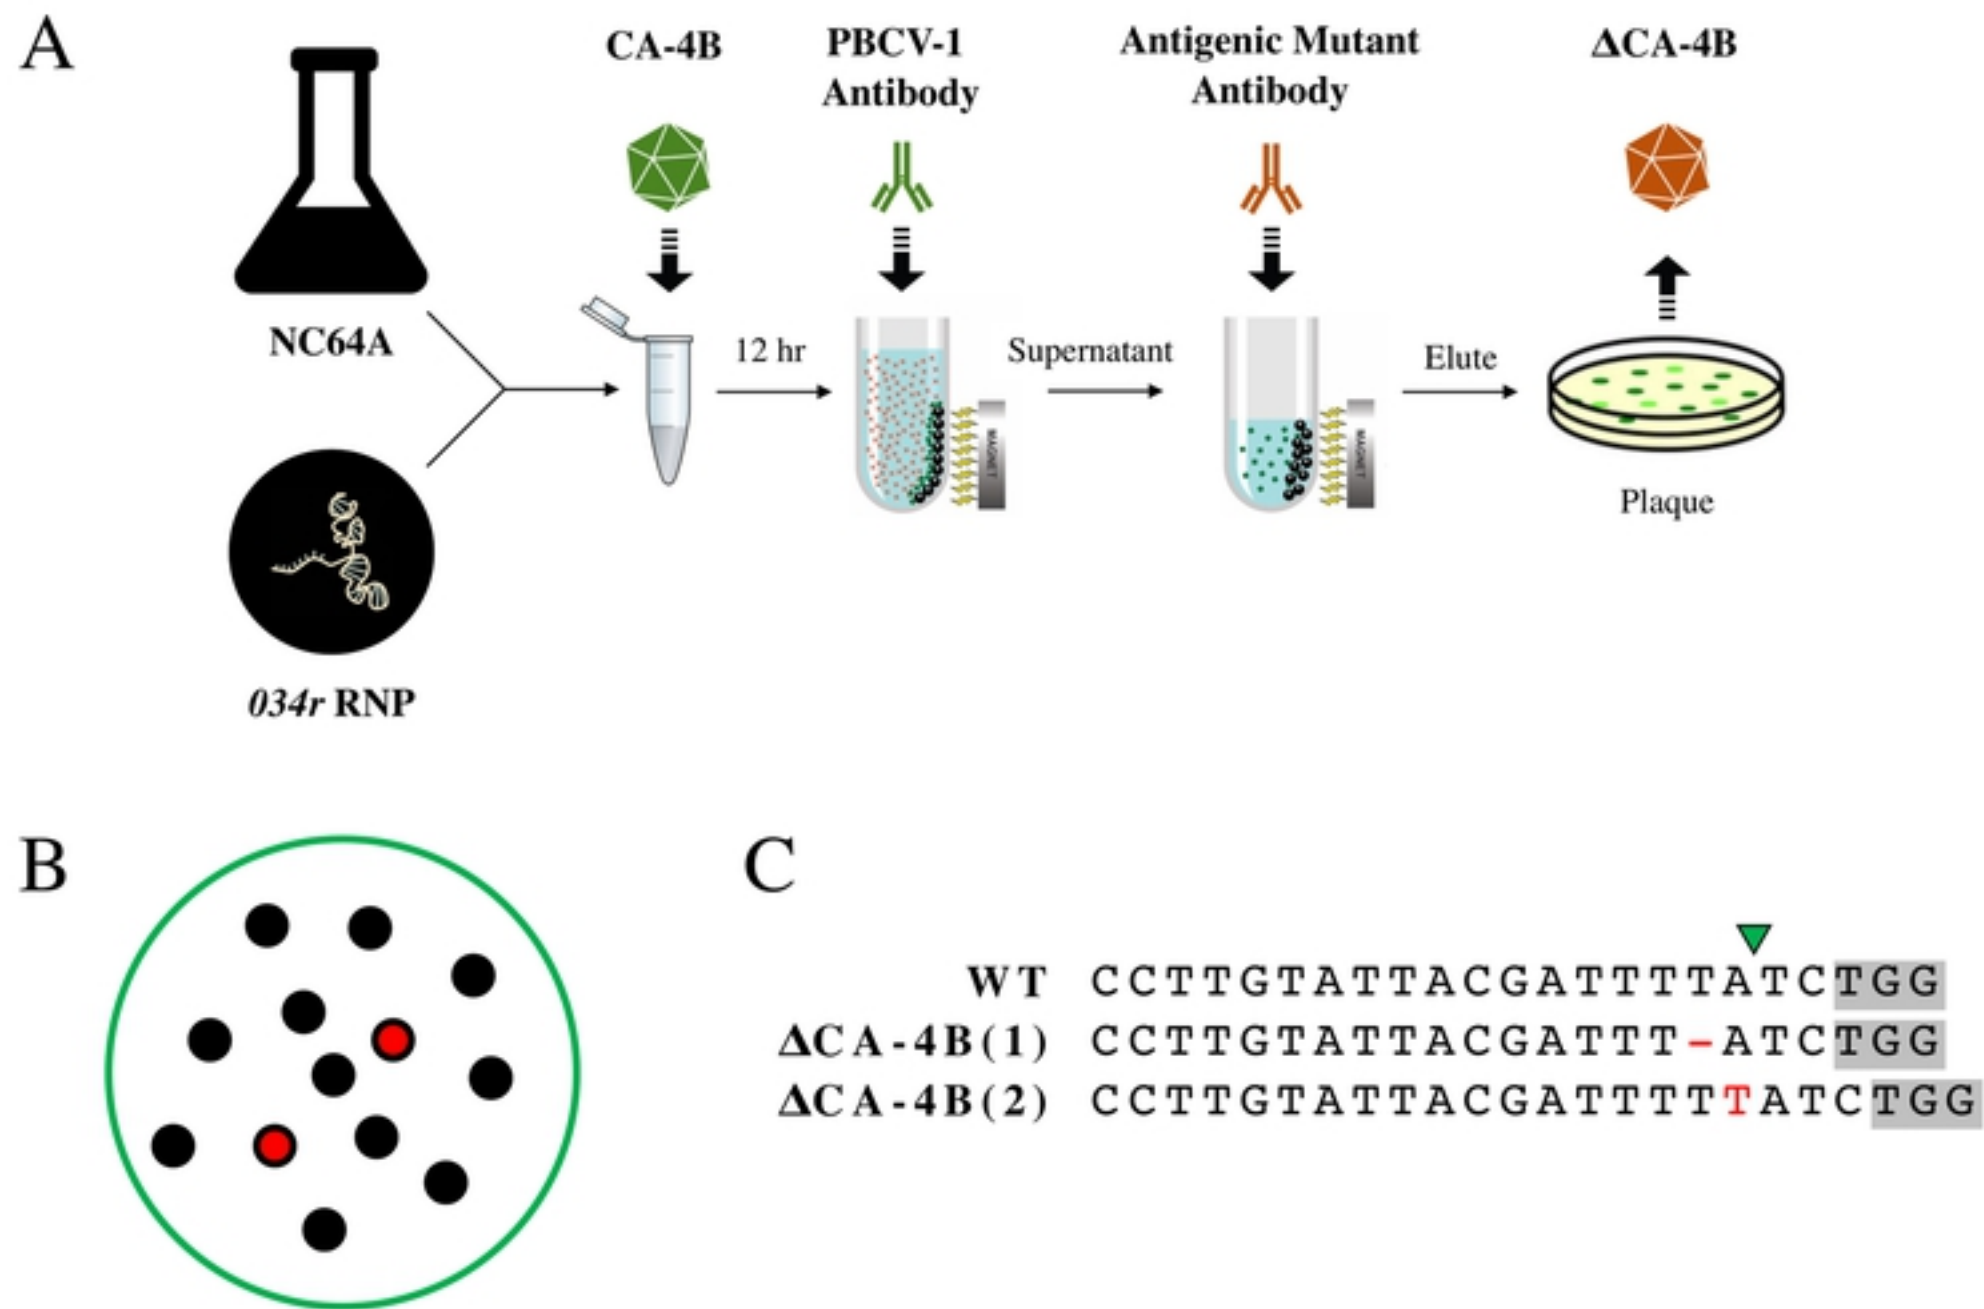

Fig 2

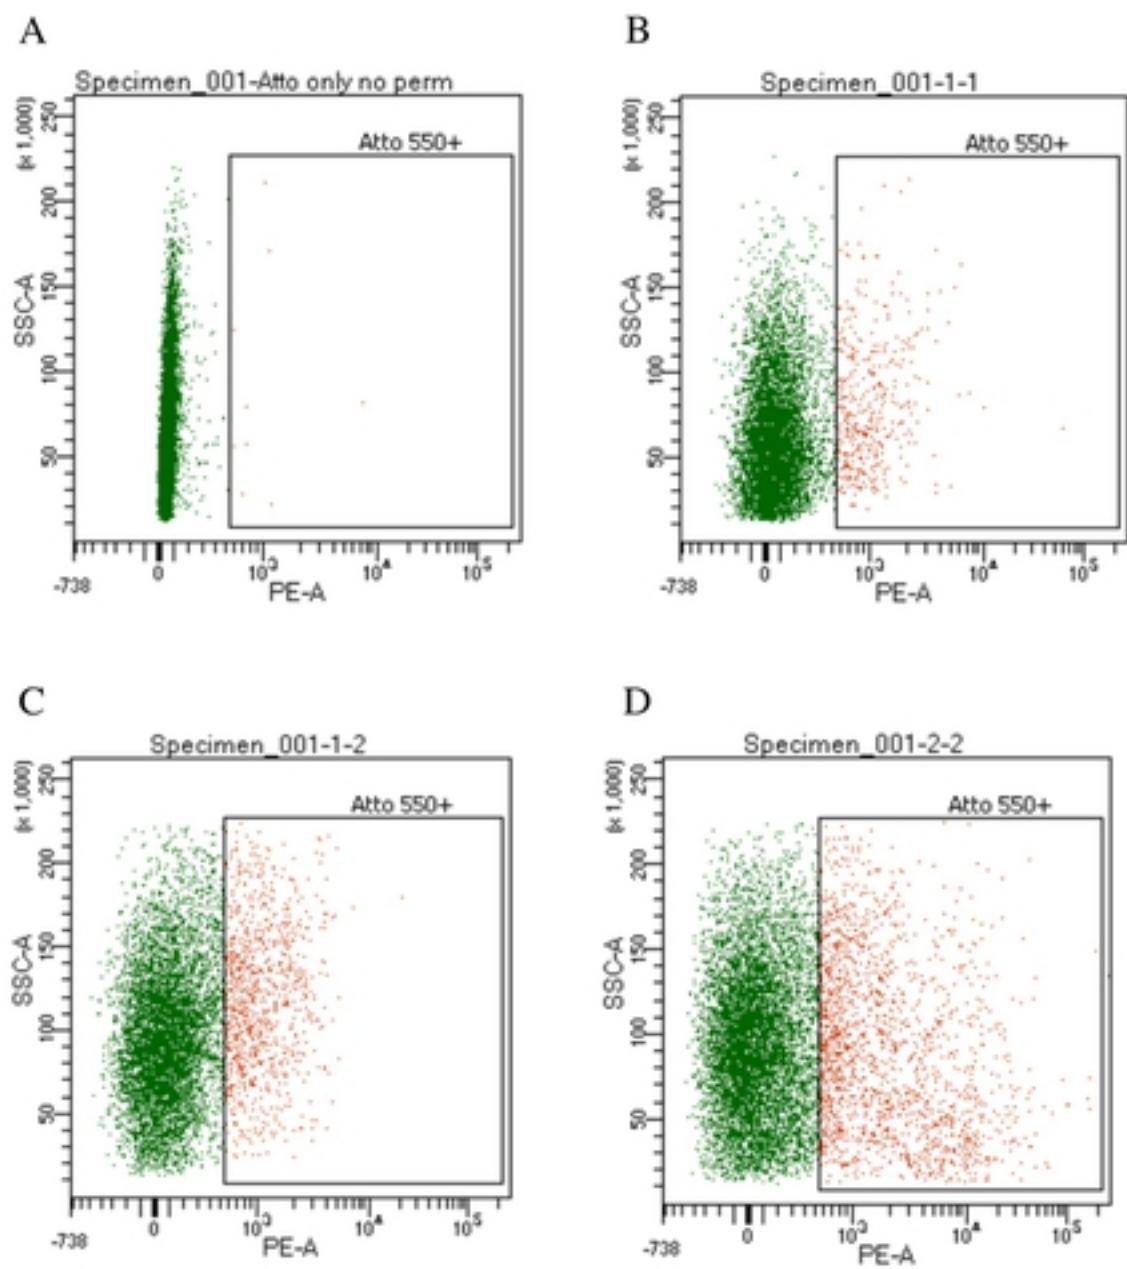

Fig 3

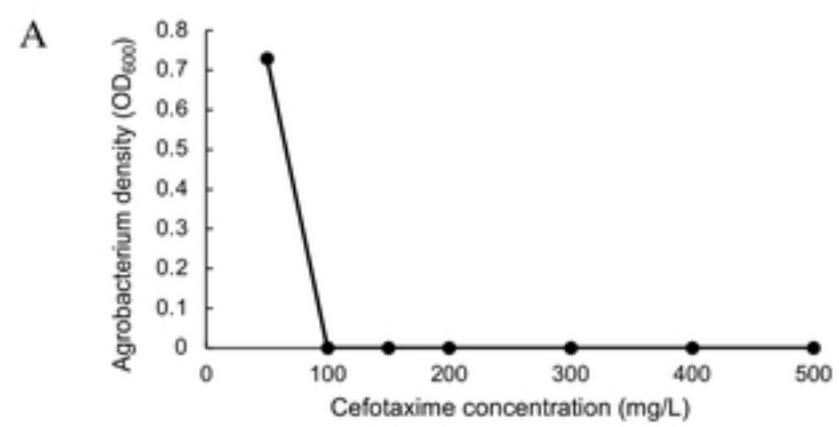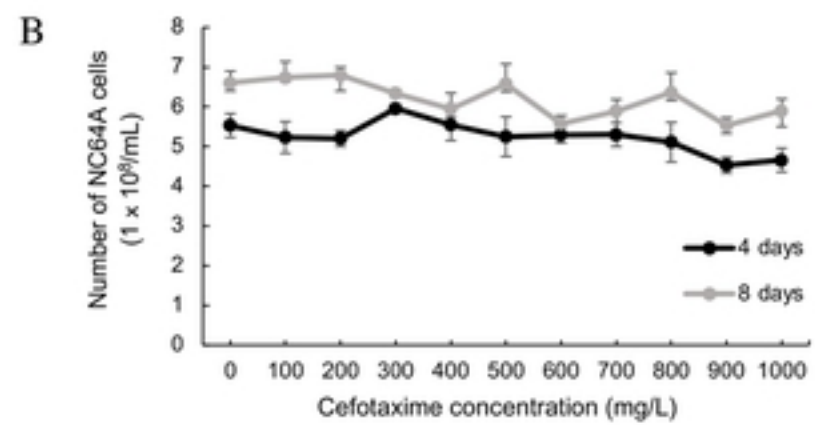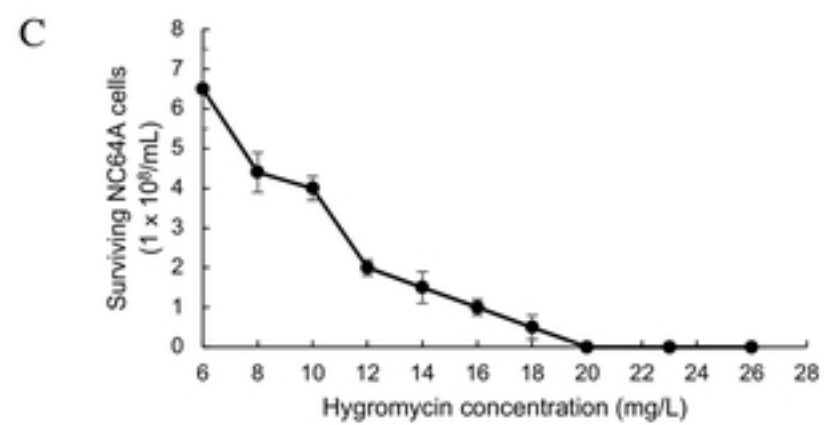

Fig 4

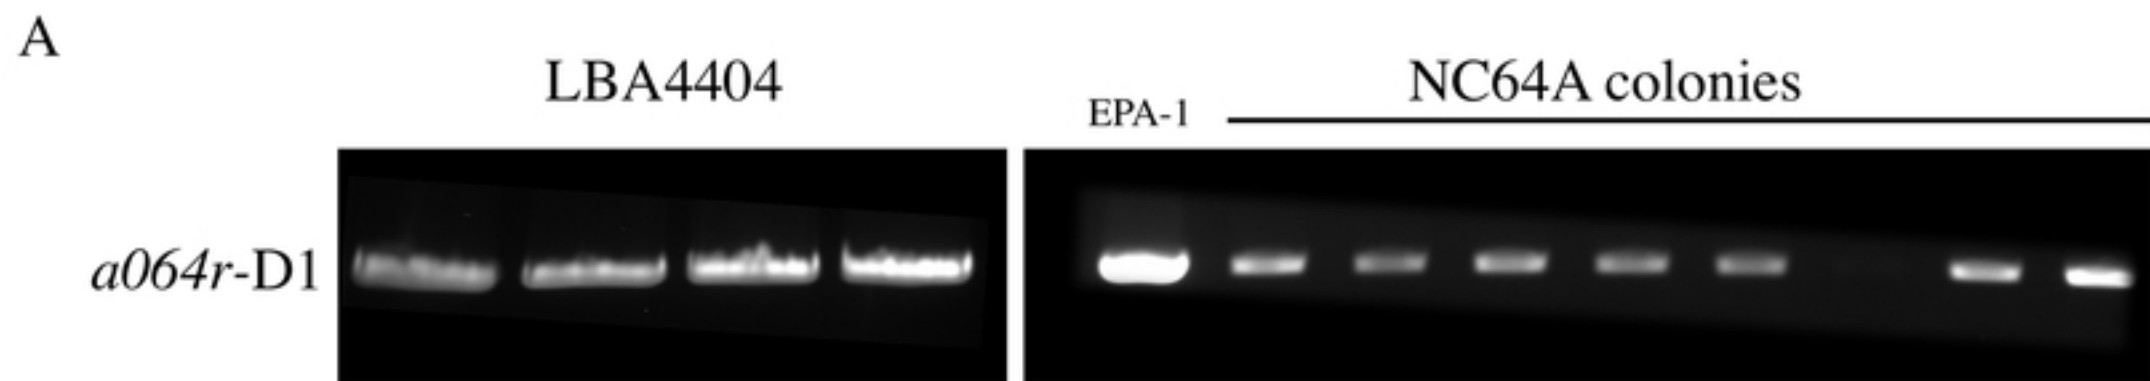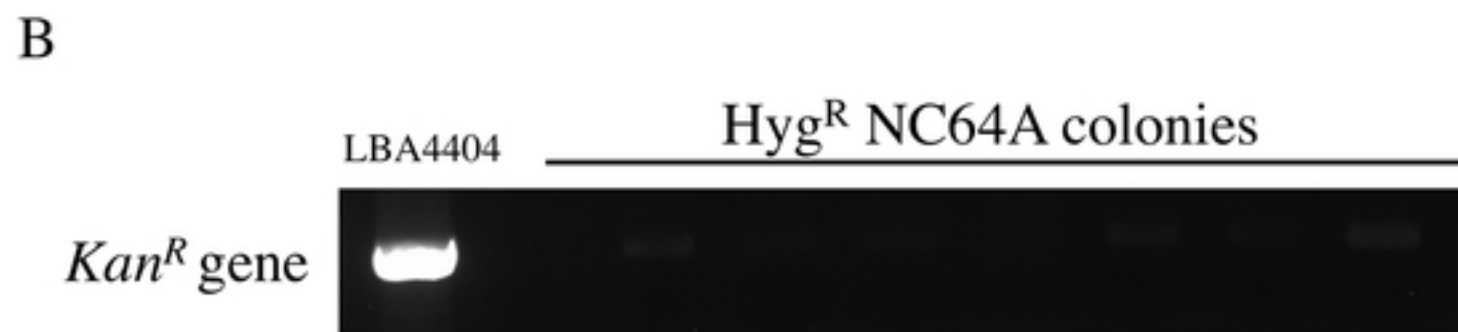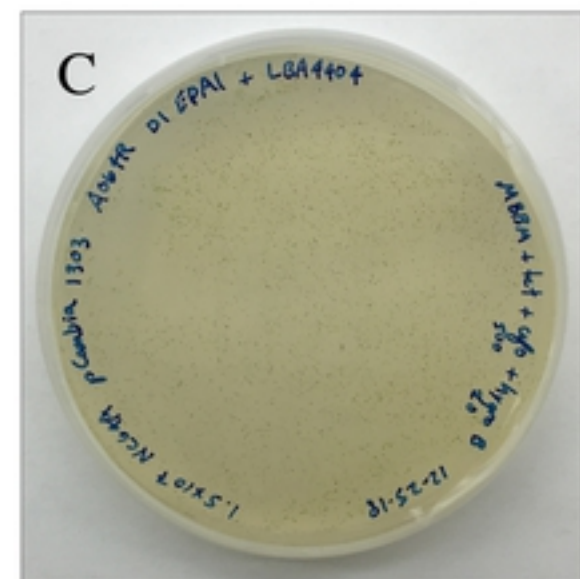

Fig 5

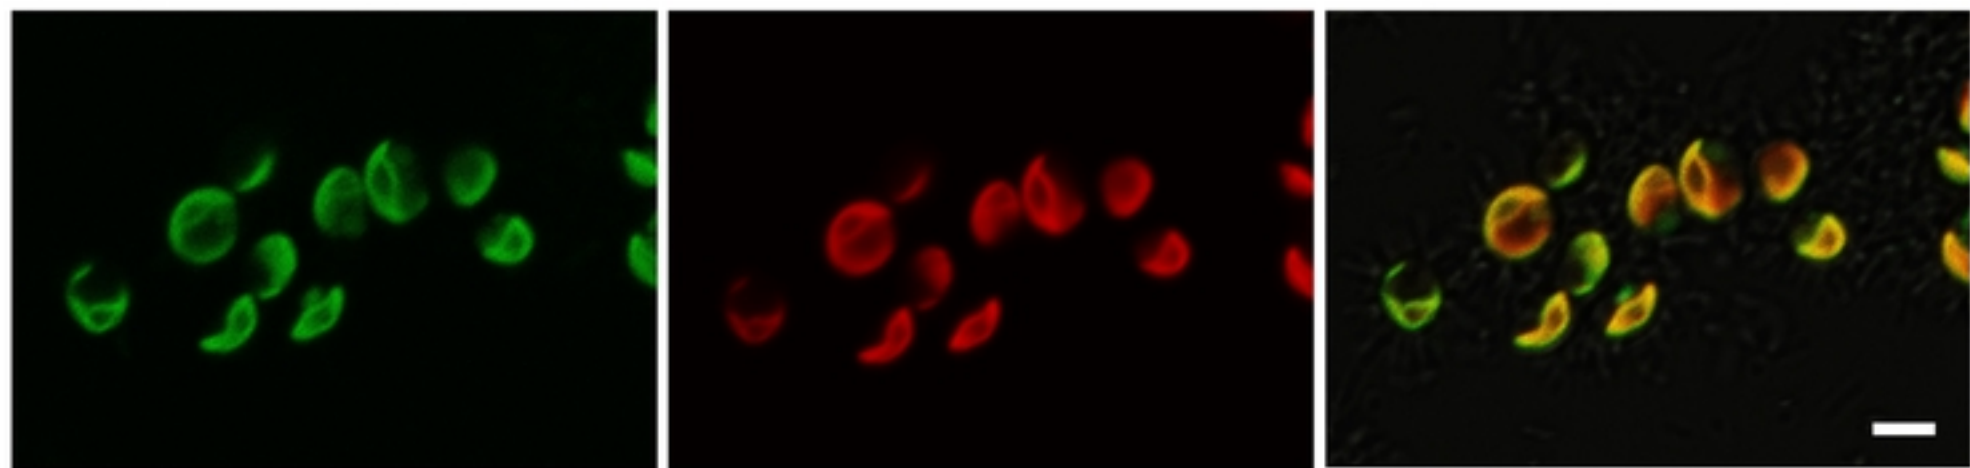

Fig 6
